# Supplementary material for: Persistence of Individual Variations in Glycated Hemoglobin
Source: Oxford University Press journal article supplement (doi:10.2337/dc10-1661), 2011-04-20

## SUPPLEMENTARY DATA

### ***The JDRF Continuous Glucose Monitoring Study Group***

*Clinical Centers:* Listed in order of number of patients enrolled with clinical center name, city, and state. Personnel are listed as (PI) for Principal Investigator, (I) for co-Investigator and (C) for Coordinators:

*Diabetes Care Center, University of Washington, Seattle, WA:* Irl B. Hirsch, M.D. (PI); Lisa K. Gilliam, M.D., Ph.D. (I); Kathy Fitzpatrick, R.N., M.N., C.D.E. (C); Dori Khakpour, R.D., C.D., C.D.E. (C); *Department of Pediatrics, Yale University School of Medicine, New Haven, CT:* Stuart A. Weinzimer, M.D. (PI); William V. Tamborlane, M.D. (I); Brett Ives, M.S.N., A.P.R.N. (C); Joan Bosson-Heenan (C); *Adult Section, Joslin Diabetes Center, Boston, MA:* Howard Wolpert, M.D. (PI); Greeshma Shetty, M.D. (I); Astrid Atakov-Castillo (C); Judith Giusti, M.S., R.D., L.D.N., C.D.E. (C); Stacey O'Donnell, R.N., C.D.E. (C); Suzanne Ghiloni, R.N., C.D.E. (C); *Atlanta Diabetes Associates, Atlanta, GA:* Bruce W. Bode, M.D. (PI); Kelli O'Neil, C.D.E. (C); Lisa Tolbert, R.N., M.N., C.D.E. (C); *Nemours Children's Clinic, Jacksonville, FL:* Tim Wysocki, Ph.D. (co-PI); Larry A. Fox, M.D. (co-PI); Nelly Mauras, M.D. (I); Kimberly Englert, R.N. (C); Joe Permuy, M.S.N., A.R.N.P. (C); *Division of Pediatric Endocrinology and Diabetes, Stanford University, Stanford, CA:* Bruce Buckingham, M.D. (PI); Darrell M. Wilson, M.D. (I); Jennifer Block, R.N., C.D.E. (C); Kari Benassi, R.N., N.P. (C); *Department of Pediatrics, University of Iowa Carver College of Medicine, Iowa City, IA:* Eva Tsalikian, M.D. (PI); Michael Tansey, M.D. (I); Debra Kucera, A.R.N.P., C.P.N.P. (C); Julie Coffey, A.R.N.P., C.P.N.P. (C); Joanne Cabbage (C); *Pediatric Adolescent, and Young Adult Section, Joslin Diabetes Center, Boston, MA:* Lori Laffel, M.D., M.P.H., (PI), Kerry Milaszewski, R.N., C.D.E. (C); Katherine Pratt (C); Elise Bismuth, M.D., M.S., (C); Joyce Keady, M.S.N., C.P.N.P. (C); Margie Lawlor, M.S., C.D.E. (C); *Barbara Davis Center for Childhood Diabetes, University of Colorado, Denver, CO:* H. Peter Chase, M.D. (PI); Rosanna Fiallo-Scharer, M.D. (I); Paul Wadwa, M.D. (I); Laurel Messer, R.N., C.D.E. (C); Victoria Gage, R.N. (C); Patricia Burdick (C); *Departments of Pediatric Endocrinology and Research and Evaluation, Kaiser Permanente, San Diego and Pasadena, CA:* Jean M. Lawrence, Sc.D., M.P.H., M.S.S.A. (co-PI); Robert Clemons, M.D. (co-PI); Michelle Maeva, R.N., C.D.E. (C); Bonnie Sattler, M.S., R.D. (C); *Coordinating Center:* Jaeb Center for Health Research, Tampa, FL: Roy W. Beck, M.D., Ph.D.; Katrina J. Ruedy, M.S.P.H.; Craig Kollman, Ph.D.; Dongyuan Xing, M.P.H.; Judy Sibayan, M.P.H.; *University of Minnesota Central Laboratory:* Michael Steffes, M.D., Ph.D., Jean M. Bucksa, C.L.S., Maren L. Nowicki, C.L.S., Carol Van Hale, C.L.S., Vicky Makky, C.L.S.

*Cost-effectiveness investigators: National Opinion Research Center, University of Chicago:* Michael O'Grady, Ph.D.; Elbert Huang, M.D., M.P.H.; Anirban Basu, Ph.D.; David O. Meltzer, M.D., Ph.D.; Lan Zhao, Ph.D. *University of Michigan:* Joyce Lee, M.D., M.P.H.

*Juvenile Diabetes Research Foundation, Inc.:* Aaron J. Kowalski, Ph.D.

*Operations Committee:* Lori Laffel, M.D., M.P.H. (co-chair), William V. Tamborlane, M.D. (co-chair), Roy W. Beck, M.D., Ph.D., Aaron J. Kowalski, Ph.D., Katrina J. Ruedy, M.S.P.H.

*Data and Safety Monitoring Board:* Ruth S. Weinstock, M.D., Ph.D. (chair), Barbara J Anderson, Ph.D.; Davida Kruger, M.S.N., A.P.R.N.; Lisa LaVange, Ph.D.; Henry Rodriguez, M.D.

# SUPPLEMENTARY DATA

**Supplementary Table 1. Spearman Correlation of MG/A1c ratio by subgroups (N=558)**

|                        | <b>3 M vs 6 M</b> | <b>6 M vs 9 M</b> | <b>9 M vs 12 M</b> |
|------------------------|-------------------|-------------------|--------------------|
| <b>Overall</b>         | 0.75 (N=184)      | 0.70 (N=143)      | 0.79 (N=231)       |
| <b>Age (years)</b>     |                   |                   |                    |
| 8-14                   | 0.57 (N=54)       | 0.60 (N=38)       | 0.71 (N=48)        |
| 15-24                  | 0.64 (N=49)       | 0.46 (N=29)       | 0.65 (N=54)        |
| ≥25                    | 0.78 (N=81)       | 0.75 (N=76)       | 0.78 (N=129)       |
| <b>Treatment Group</b> |                   |                   |                    |
| RT-CGM                 | 0.75 (N=184)      | 0.70 (N=143)      | 0.72 (N=115)       |
| Control                | NA                | NA                | 0.83 (N=116)       |
| <b>Gender</b>          |                   |                   |                    |
| Female                 | 0.67 (N=99)       | 0.72 (N=75)       | 0.80 (N=128)       |
| Male                   | 0.83 (N=85)       | 0.69 (N=68)       | 0.76 (N=103)       |
| <b>CGM Device *</b>    |                   |                   |                    |
| DexCom                 | 0.76 (N=38)       | 0.78 (N=23)       | 0.72 (N=45)        |
| Navigator              | 0.79 (N=41)       | 0.69 (N=32)       | 0.74 (N=45)        |
| Paradigm               | 0.74 (N=100)      | 0.70 (N=85)       | 0.83 (N=134)       |

\*Five epochs in 3 vs. 6 months, 3 in 6 vs. 9 months, and 7 in 9 vs. 12 months were excluded due to the switch of CGM device type during the 3-month period.

## SUPPLEMENTARY DATA

### Supplementary Figure 1: Comparison of the Hemoglobin Glycation Index (HGI) calculated from JDRF RCT data (currently under review) from the same subject at different times

The HGI at each time point was calculated as the difference between the actual A1c and the predicted A1c from model  $A1c = 0.026 * \text{mean glucose} + 3.069$ . The HGI of subjects in 3-month periods were compared. The HGI at the earlier time is on the horizontal axis and the HGI 3 months later on the vertical axis. Spearman correlation values are given for all four times.

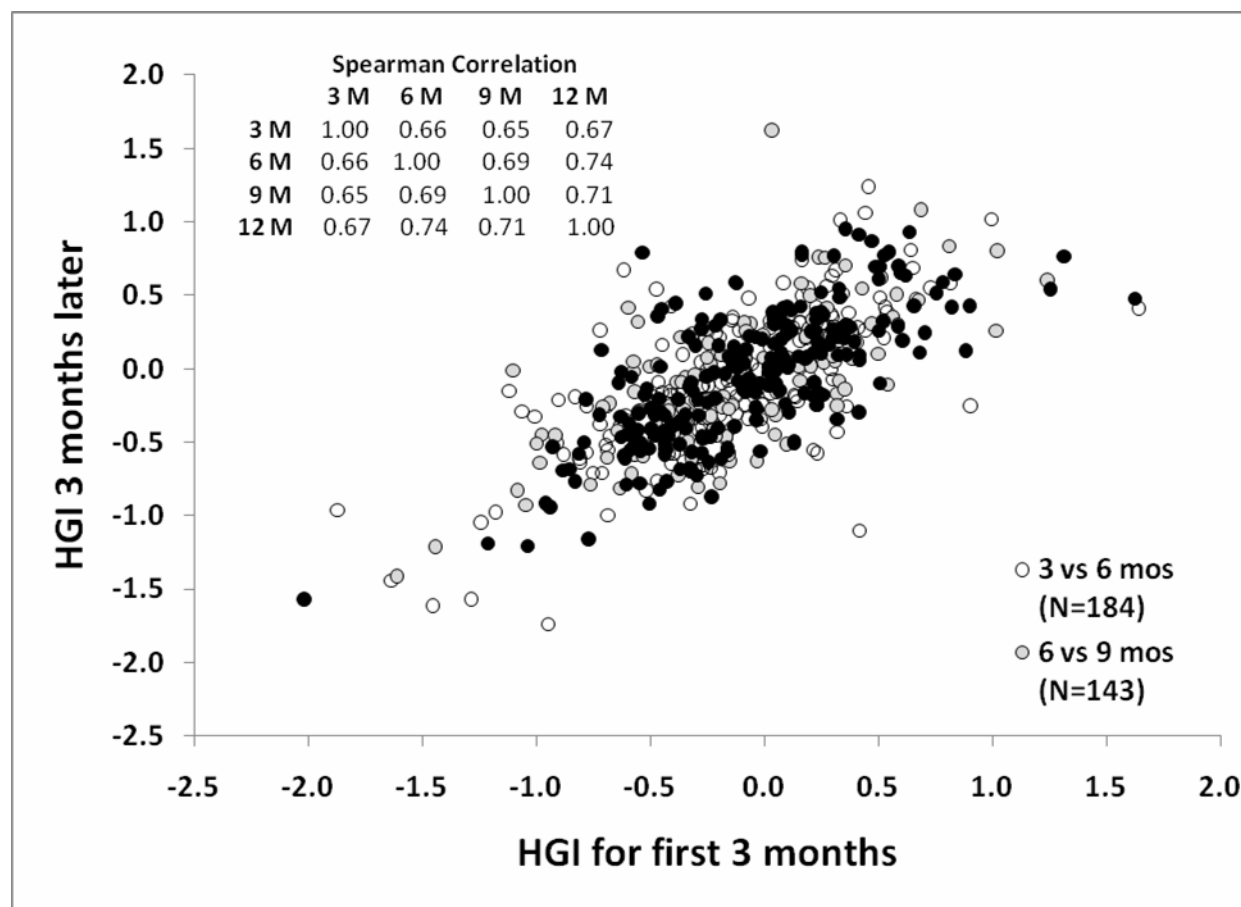

**Supplementary Figure 2: Comparison of the Hemoglobin Glycation Index (HGI) calculated from ADA equation from the same subject at different times**

The HGI at each time point was calculated as the difference between the actual A1c and the predicted A1c from model  $A1c = 0.029 * \text{mean glucose} + 2.455$  (12). Study originally reported slope from a model with MG as the dependent variable (i.e.,  $MG = 28.7 \times A1c - 46.7$ ,  $R^2 = 0.84$ ). Values were converted to equivalent slope and intercept with A1c as the dependent variable using the reported  $R^2$  value. The HGI of subjects in 3-month periods were compared. The HGI at the earlier time is on the horizontal axis and the HGI 3 months later on the vertical axis. Spearman correlation values are given for all four times

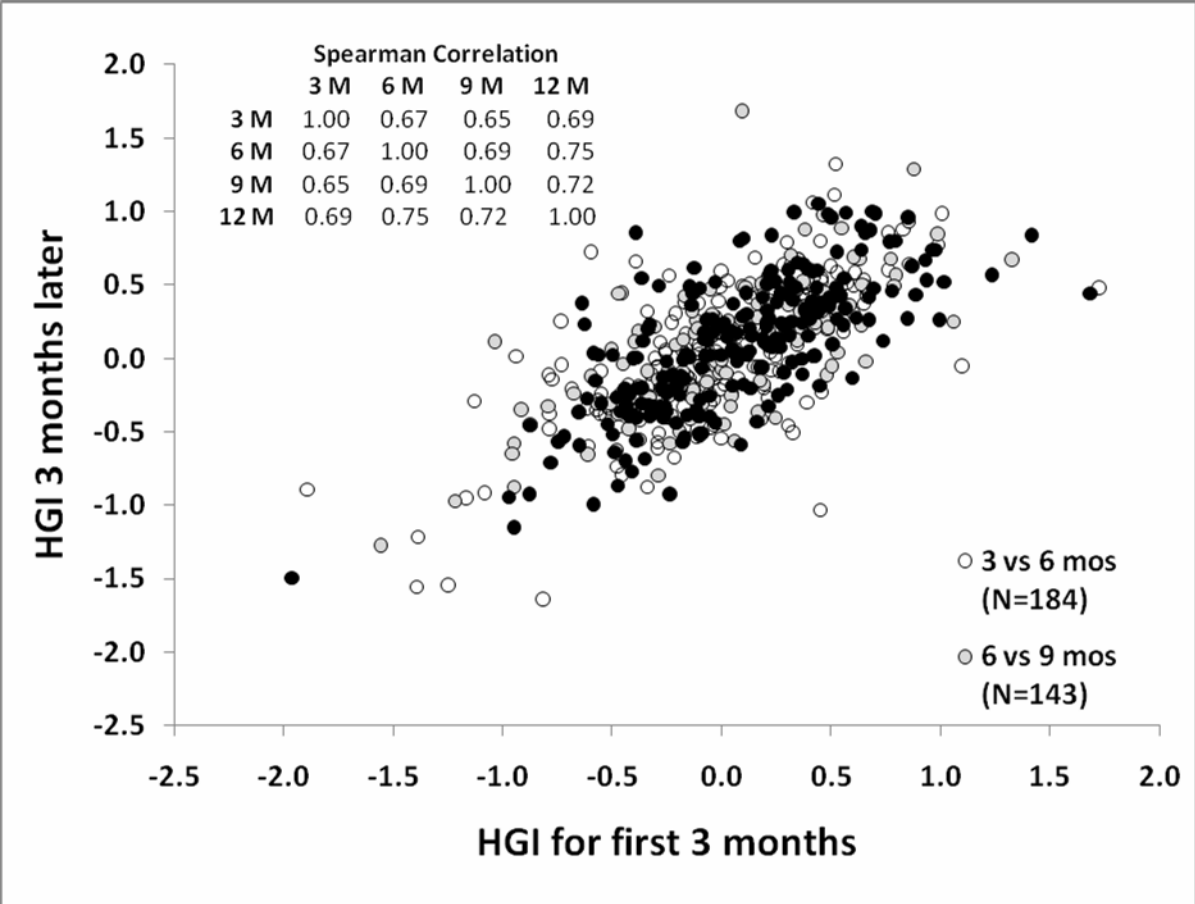

**Supplementary Figure 3: Comparison of the ratio of the change in MG to the change in A1c between successive visits from the same subject at different times**

For each subject the change in MG from the previous visit was divided by the change in A1c over that same timeframe (limited to epochs where A1c changed by at least  $\pm 0.3\%$ ). The ratio at the earlier pair of visits is on the horizontal axis and the same ratio 3 months later on the vertical axis. Spearman correlation values are given for three pairs of successive visits (3-6M, 6-9M and 9-12M).

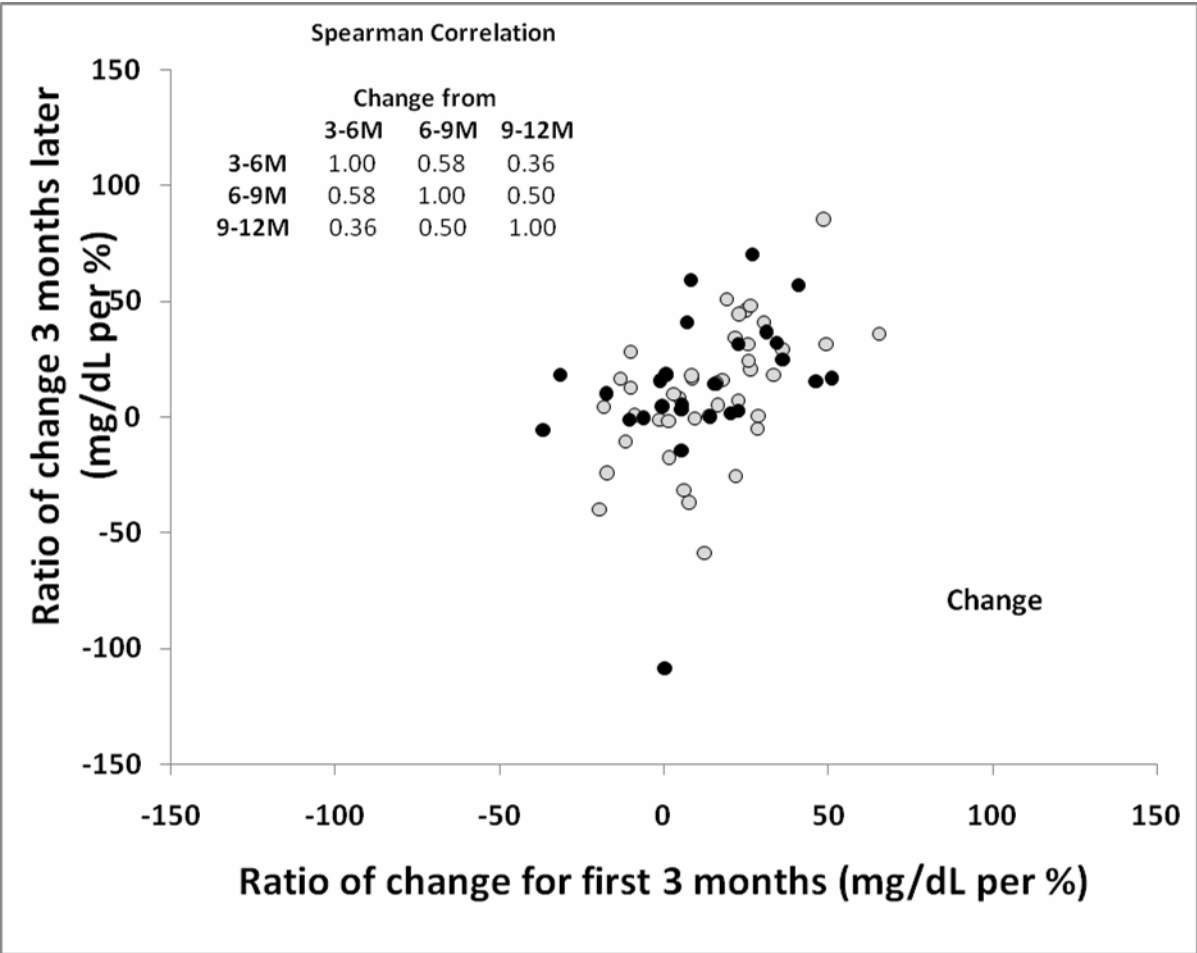

## SUPPLEMENTARY DATA

### Supplementary Figure 4: Comparison of the MG/A1c ratio from the same subject at different times separately for treatment groups.

This is a replication of Figure in manuscript for each treatment group. The MG/A1c ratios of subjects in 3-month periods were compared. The ratio at the earlier time is on the horizontal axis and the ratio 3 months later on the vertical axis. Spearman correlation values are given for all four times

#### 4a. CGM Group

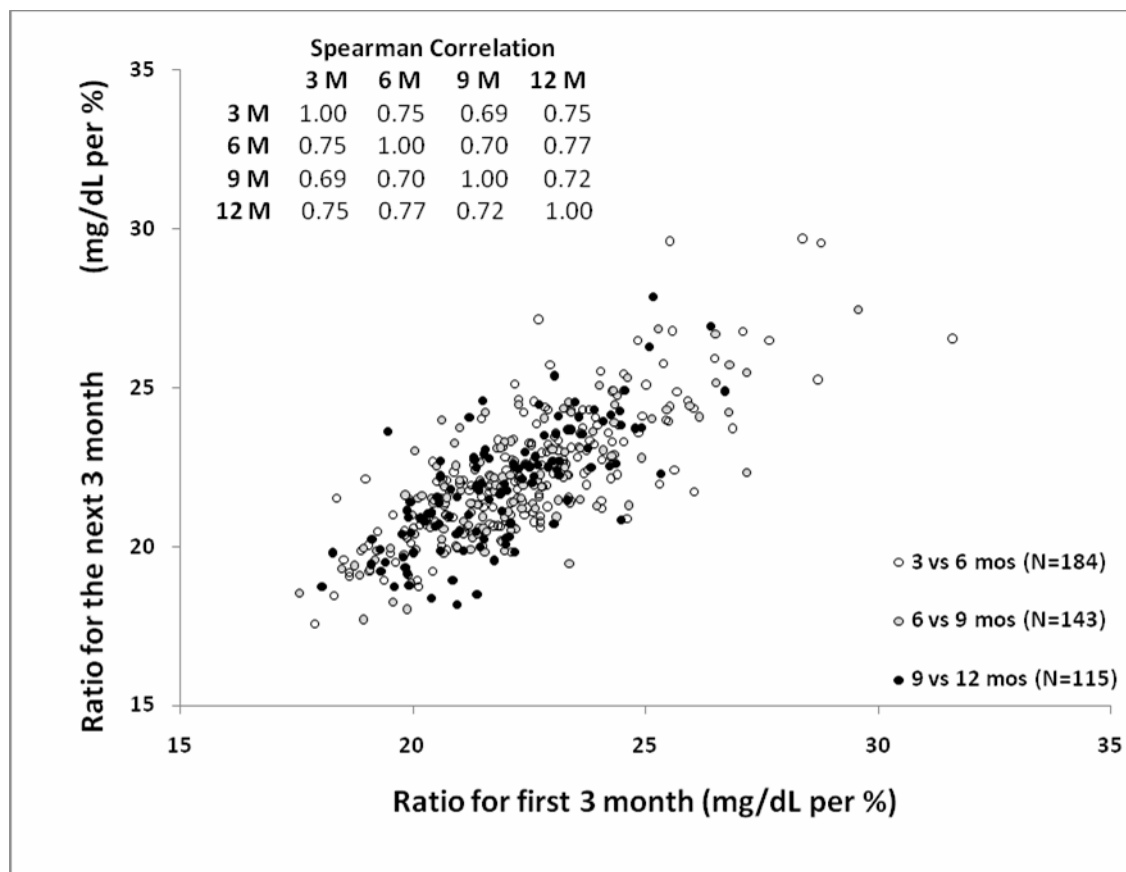

SUPPLEMENTARY DATA

4b. Control Group

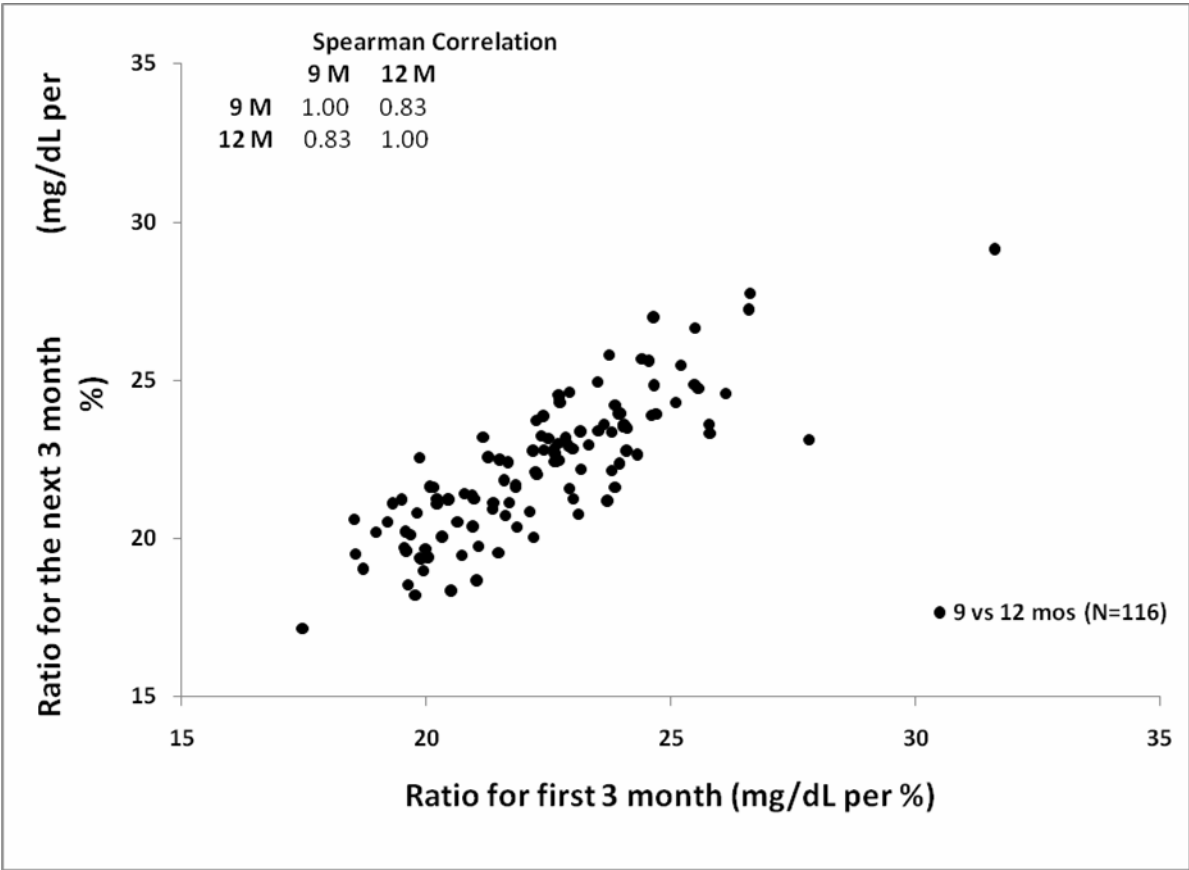

Supplement: dc101661supplementarydata.pdf [file dc101661supplementarydata.pdf]
